# Supplementary material
Source: PubMed Central journal article supplement (PMC5701824)
Supplement: NIHMS902933-supplement-1.pdf [file NIHMS902933-supplement-1.pdf]

*Lee, et al.,*

**Mechanical confinement regulates cartilage matrix formation by  
chondrocytes**

Hong-pyo Lee<sup>1</sup>, Luo Gu<sup>2,3</sup>, David J. Mooney<sup>2,3</sup>, Marc E. Levenston<sup>1</sup> and Ovijit Chaudhuri<sup>1†</sup>

<sup>1</sup>Department of Mechanical Engineering, Stanford University, Stanford, CA 94305, USA

<sup>2</sup>School of Engineering and Applied Sciences, Harvard University, Cambridge, MA 02138, USA.

<sup>3</sup>Wyss Institute for Biologically Inspired Engineering, Harvard University, Cambridge MA  
02138, USA.

†Correspondence to: [chaudhuri@stanford.edu](mailto:chaudhuri@stanford.edu)

## Supplementary Information

### Supplementary Figures and Legends

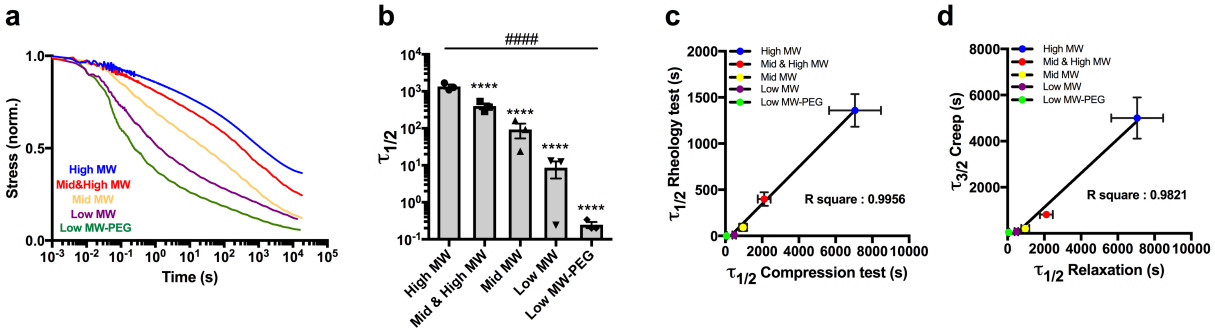

**Supplementary Figure 1 | Rheology for stress relaxation of alginate hydrogels and a linear correlation between the timescale for creep and the timescale for stress relaxation.** **a**, Shear stress relaxation profile of alginate hydrogels composed of alginate of varying molecular weights, or modified with a short PEG spacer, conducted in a rheometer. For all experiments, a 15% shear strain was applied. **b**, Quantification of the time scale of stress relaxation for the different alginate hydrogels ( $n=3$  replicates per conditions, #####  $p < 0.0001$  by Spearman's rank correlation and \*\*  $p < 0.01$ , \*\*\*  $p < 0.001$ , and \*\*\*\*  $p < 0.0001$  compared to high MW alginate condition by one-way ANOVA). **c**, Scatter plots of the relaxation times ( $\tau_{1/2}$ ) from compression or shear. Linear regression analysis indicated a linear correlation between two groups of relaxation time (R square = 0.9956). **d**, Scatter plots between the relaxation times ( $\tau_{1/2}$ ) from compression and the creep times ( $\tau_{3/2}$ ) from shear. Linear regression analysis indicated a linear correlation between two groups of timescales (R square = 0.9821). Data are shown as mean  $\pm$  s.e.m.

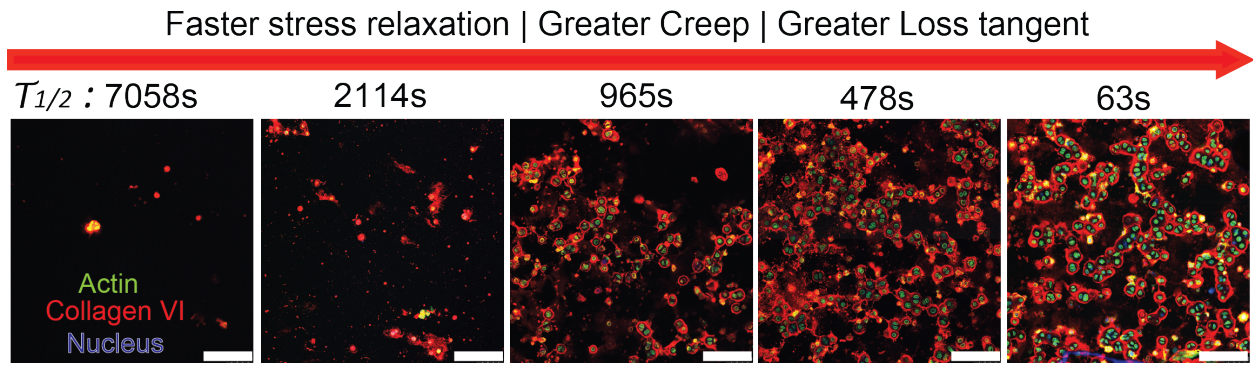

**Supplementary Figure 2 | Pericellular matrix deposition in 3kPa hydrogels.** Representative stainings of type VI collagen produced by chondrocytes cultured in 3kPa hydrogels for 21 days in the indicated conditions. Scale bar, 200  $\mu\text{m}$ .

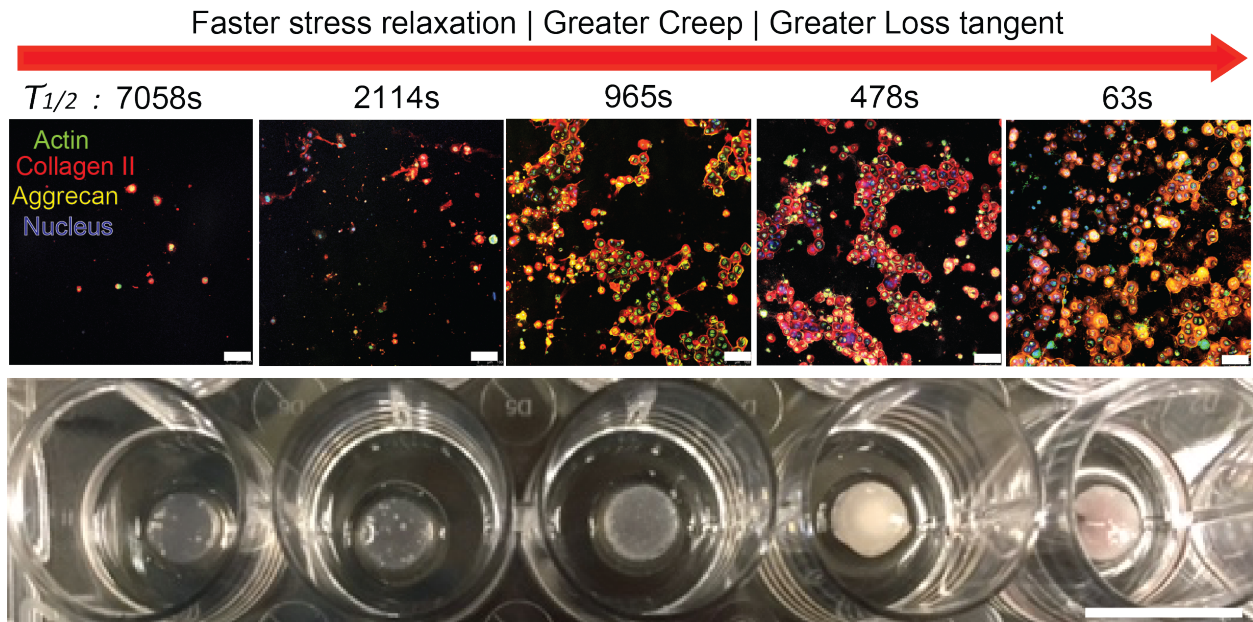

**Supplementary Figure 3 | Cartilage matrix deposition and macroscopic appearance of hydrogels containing chondrocytes after 21 days of culture. a,** Immunohistochemical stains of chondrocytes cultured in 3kPa hydrogels with varying levels of stress relaxation for 21 days. Scale bar, 100  $\mu$ m. **b,** Increased opacity was observed in hydrogels with faster stress relaxation at day 21, and the size of the constructs were found to be similar. Scale bar, 12 mm.



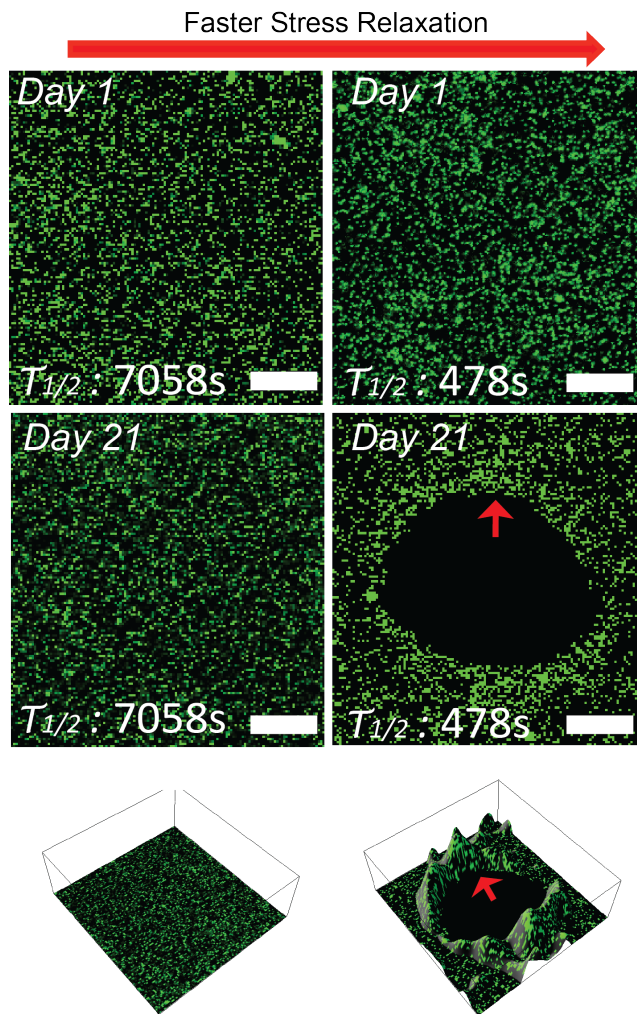

### 3D Surface Intensity Profile

**Supplementary Figure 4 | Displacement of hydrogels around cells in fast relaxing gels after 21 days of culture.** Representative images of fluorescent microbeads encapsulated in 3kPa hydrogels in indicated conditions for 1 day and 21 days. The distribution of beads was relatively uniform at 1 day of culture, and after 21 days in the slow relaxing gels. A higher density of beads was observed in areas immediately surrounding the regions that presumably contain chondrocytes and cartilage matrix in fast relaxing gels, indicating matrix displacement. Green color represents microbeads encapsulated in hydrogels. Scale bar, 50  $\mu\text{m}$ .

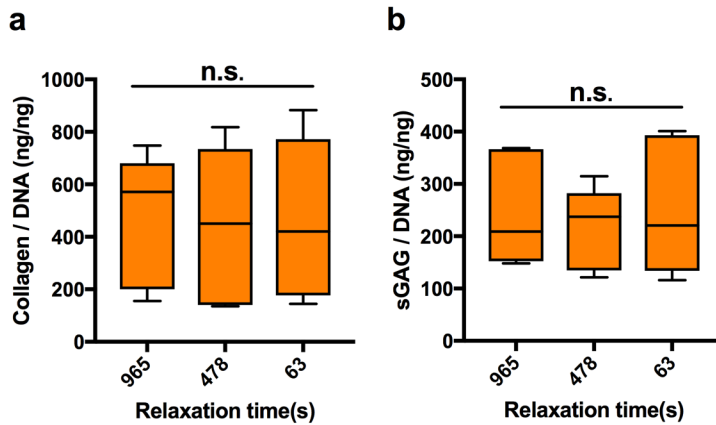

**Supplementary Figure 5 | Amounts of cartilage matrix components normalized to DNA at day 21.** Quantification of (a) collagen and (b) sGAG produced by chondrocytes cultured in 3kPa hydrogels with stress relaxation times ranging from  $\tau_{1/2} = 965$  seconds to 63 seconds for day 21. No significant differences among normalized amounts of both collagen and sGAG were measured (one-way ANOVA,  $p > 0.9999$  for collagen,  $p > 0.0883$  for sGAG). The box plots show 25/50/75th percentiles, whiskers show minimum/maximum,  $n=4$  biological replicates per conditions.

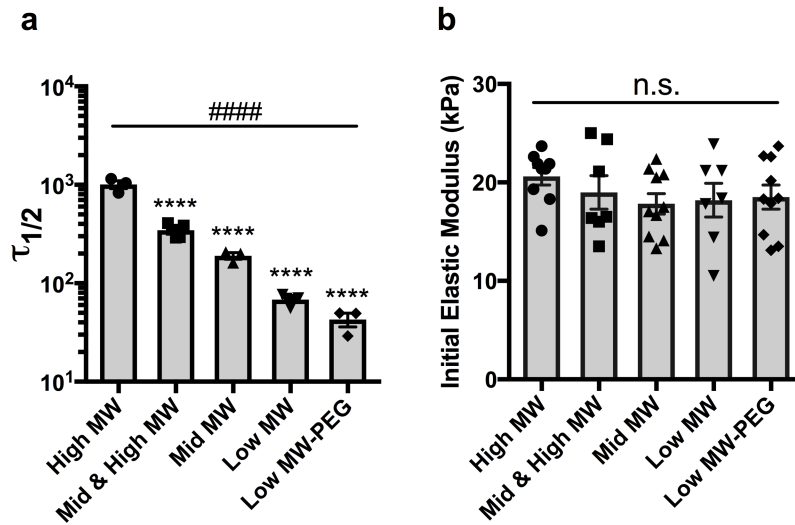

**Supplementary Figure 6 | Modulation of stress relaxation rate in alginate hydrogels with an initial elastic modulus of 20kPa** **a**, Quantified time scales of stress relaxation for stiff alginate hydrogels (n=3 replicates per conditions, #####  $p < 0.0001$  by Spearman's rank correlation and \*\*\*\*  $p < 0.0001$  compared to high MW alginate condition by one-way ANOVA). **b**, Initial elastic moduli of the stiff alginate hydrogels are similar for all formulations (n=7 replicates per conditions,  $p > 0.3130$  compared to high MW alginate condition by one-way ANOVA). Data are shown as mean  $\pm$  s.e.m.

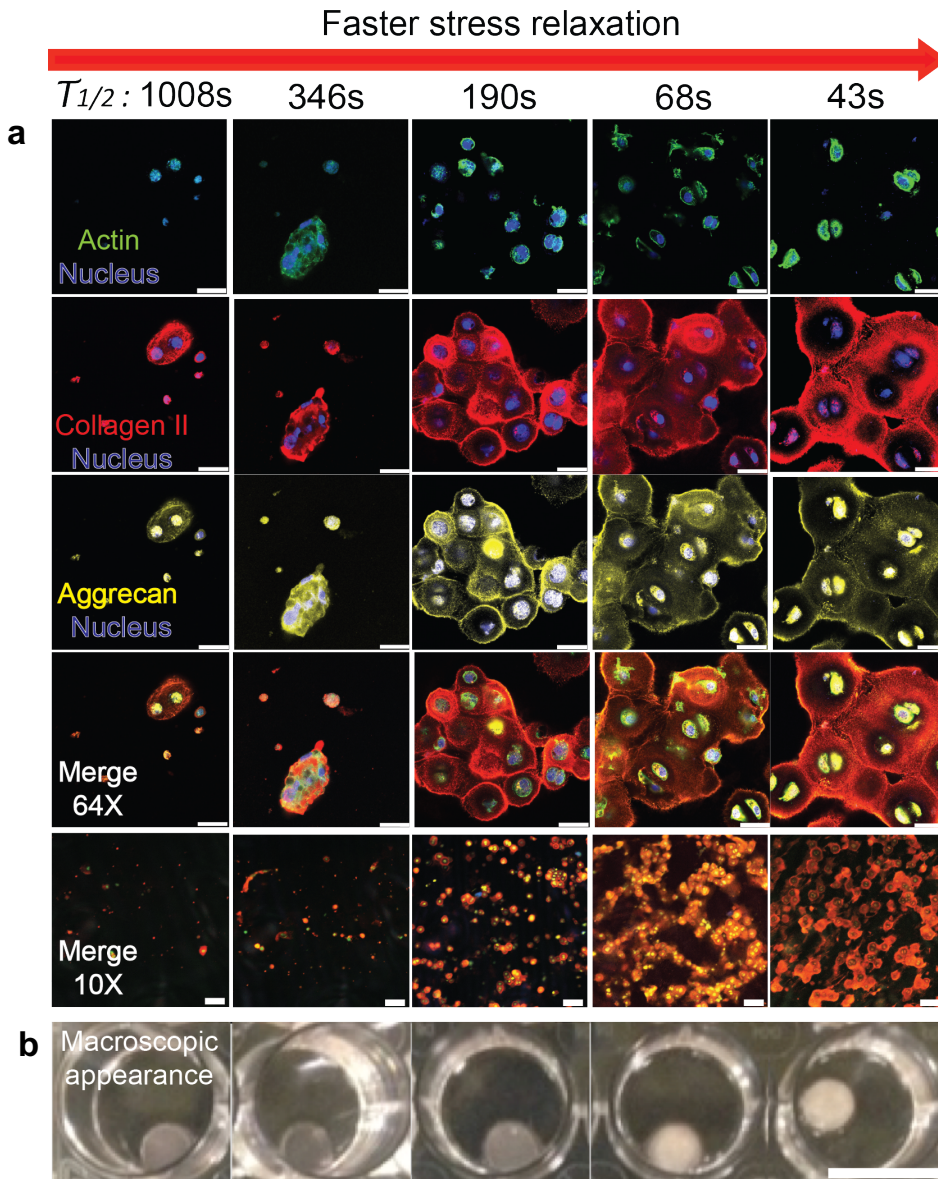

**Supplementary Figure 7 | Cartilage matrix deposition by chondrocytes cultured in 20 kPa hydrogels** **a**, Immunohistochemical stains of chondrocytes cultured in 20 kPa hydrogels with varying levels of stress relaxation for 21 days. Scale bar is 25  $\mu\text{m}$  for 64X images and 100  $\mu\text{m}$  for 10X images. **b**, Increased opacity was observed in 20kPa hydrogels with faster stress relaxation at day 21, and the size of the constructs were found to be similar. Scale bar, 12 mm.

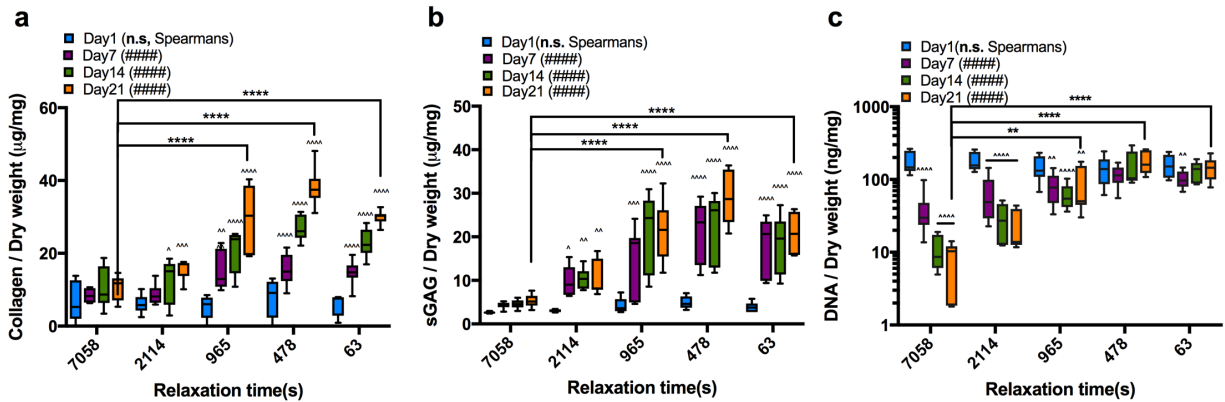

**Supplementary Figure 8 | Amounts of cartilage matrix components and DNA contained in**

**20 kPa hydrogels containing chondrocytes after 3 weeks of culture a-c, Quantification of (a)**

collagen, (b) sGAG and (c) DNA from constructs consisting of chondrocytes cultured in 20 kPa

hydrogels with varying stress relaxation for 21 days. ##### located beside each legend indicates  $p$

$< 0.0001$ (Spearman's rank correlation). ^^, ^^, and ^^ indicate statistically significant

differences when compared to value at Day 1 with  $p < 0.01$ ,  $0.001$ , and  $0.0001$  respectively (two-

way ANOVA). \*\*, \*\*\* and \*\*\*\* indicate statistically significant differences when compared to

slow relaxing gel condition ( $\tau_{1/2} = 1008s$ ) with  $p < 0.01$ ,  $0.001$  and  $0.0001$  respectively (two-way

ANOVA). The box plots show 25/50/75th percentiles, whiskers show minimum/maximum,  $n=4$

biological replicates per conditions.

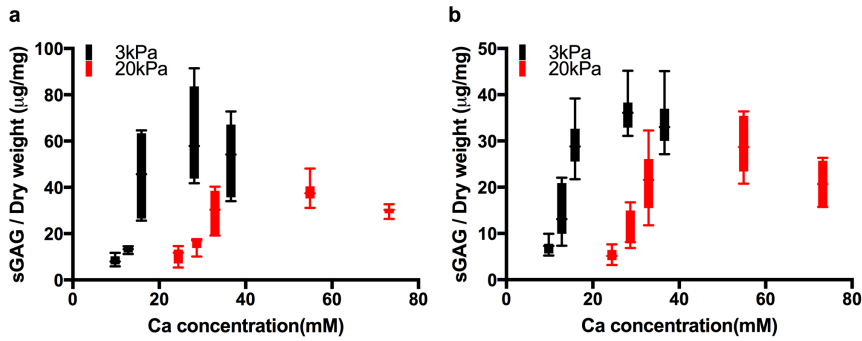

**Supplementary Figure 9 | Amounts of cartilage matrix deposition are not correlated with calcium crosslinker concentration.** Quantification of (a) collagen and (b) sGAG from constructs containing chondrocytes cultured in 3kPa and 20 kPa hydrogels for 21 days as a function of the concentration of calcium used to crosslink the matrix. There is no correlation between calcium concentration and the amounts of cartilage matrix components produced by chondrocytes (Spearman rank correlation,  $p > 0.233$  for collagen,  $p > 0.0833$  for sGAG). The box plots show 25/50/75th percentiles, whiskers show minimum/maximum,  $n=4$  biological replicates per conditions.

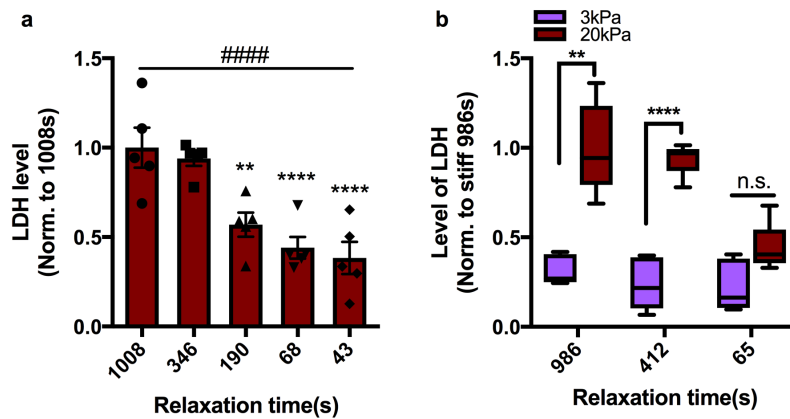

**Supplementary Figure 10 | Cell death levels are greater in stiffer gels. a**, Quantification of LDH levels from constructs consisting of chondrocytes cultured in 20 kPa hydrogels varying levels of stress relaxation for 7 days. Values are normalized by the value in the slowest relaxing gel condition ( $\tau_{1/2} = 1008$ s). (#####  $p < 0.0001$  by Spearman’s rank correlation and \*\*  $p < 0.01$ , \*\*\*\*  $p < 0.0001$  compared to slow relaxing gel condition ( $\tau_{1/2} = 1008$ s) by one-way ANOVA, mean  $\pm$  s.e.m.). **b**, Comparison of LDH levels for chondrocytes encapsulated in stiff or soft alginate gels. (\*\*  $p < 0.01$  and \*\*\*\*  $p < 0.0001$  by student’s t-test). The box plots show 25/50/75th percentiles, whiskers show minimum/maximum,  $n=5$  replicates per conditions.

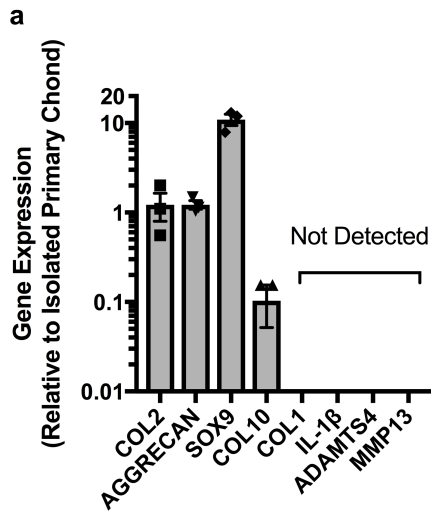

**Supplementary Figure 11 | Gene expression of chondrocytes harvested from bovine articular cartilage.** Quantification of relative gene expression of type II collagen (COL2), aggrecan (AGGRECAN), Sox9 (SOX9), type X collagen (COL10), type I collagen (COL1), IL-1 $\beta$ , an aggrecanase (ADAMTS4), and a collagenase (MMP13) from chondrocytes extracted from articular cartilage. Values are normalized by the value measured in isolated primary chondrocytes. Data are shown as mean  $\pm$  s.e.m, n=3 replicates per conditions.



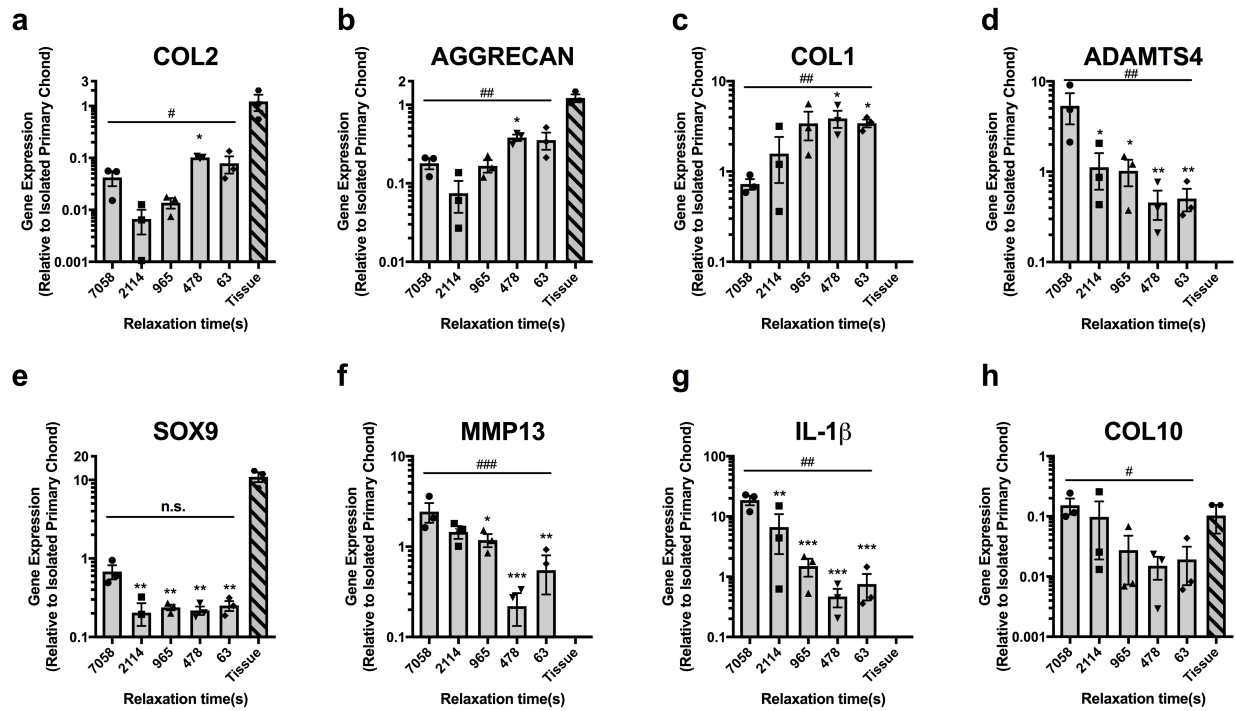

**Supplementary Figure 12 | Gene expression in chondrocytes cultured in 3 kPa hydrogels for 21 days a-h**, Quantification of relative gene expression of (a) type 1 collagen (COL1), (b) an aggrecanase (ADAMTS4), (c) a collagenase (MMP13), (d) Sox9 (SOX9), (e) IL-1 $\beta$  and (f) type X collagen (COL10). Values are normalized by the value measured in isolated primary chondrocytes. #, ## and ### on the top indicate  $p < 0.05$ , 0.01, and 0.001 respectively (Spearman's rank correlation). \*, \*\*, \*\*\*, and \*\*\*\* indicate statistically significant differences when compared to the slow relaxing gel condition ( $\tau_{1/2} = 1008s$ ) with  $p < 0.01$ , 0.001 and 0.0001 respectively (one-way ANOVA). All data are shown as mean  $\pm$  s.e.m., n=3 replicates per conditions.

Faster stress relaxation / Greater Creep / Greater Loss Tangent

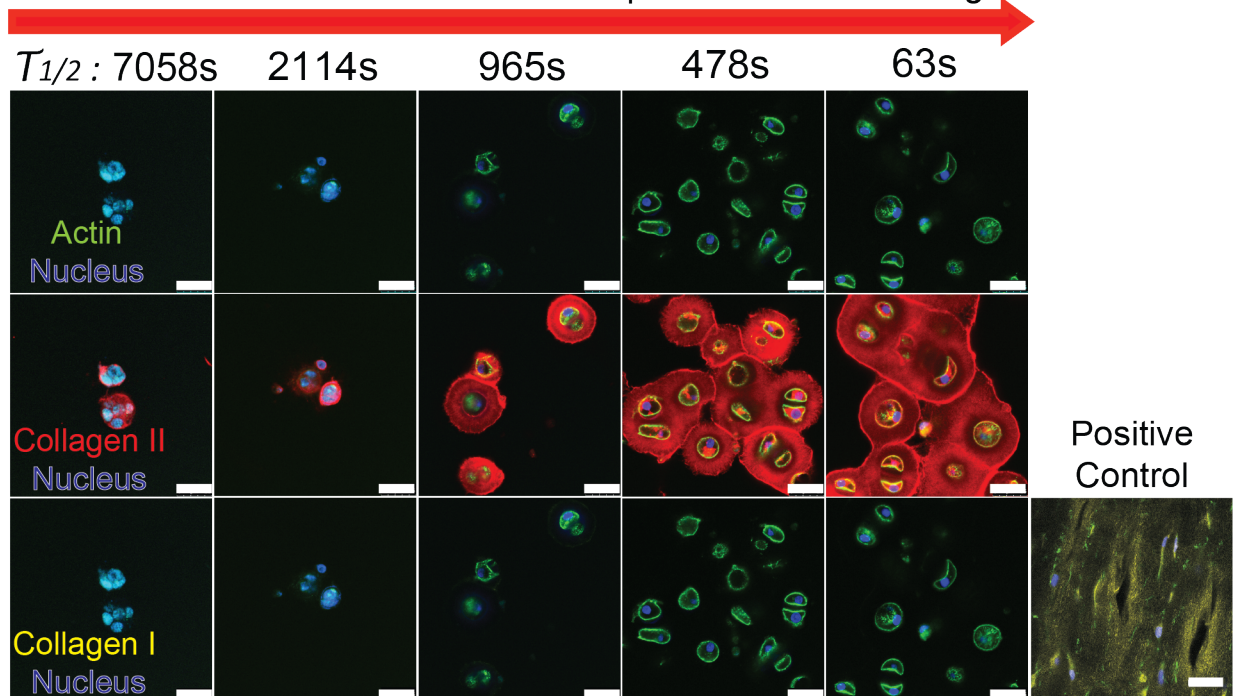

**Supplementary Figure 13 | Type I collagen and type II collagen deposition by chondrocytes**

**cultured in 3 kPa gels** Representative stainings of collagen produced by chondrocytes cultured in 3kPa hydrogels for 21 days with the indicated timescale of stress relaxation, and in bovine fibrocartilage as a positive control. No staining of type I collagen is observed. Scale bar, 25  $\mu$ m.

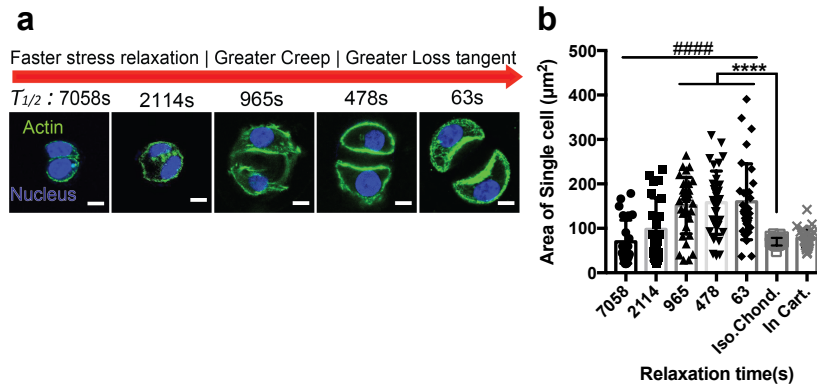

**Supplementary Figure 14 | Size differences of chondrocytes cultured in 3 kPa alginate hydrogels for 21 days** **a**, Representative immunofluorescence images with staining for actin (green) and nucleus (blue) for chondrocytes cultured in the indicated conditions for three weeks. Scale bar, 5µm. **b**, Quantification of single cell size for chondrocytes in hydrogels indicated conditions after three weeks of culture ( $n > 50$  cells per conditions). The size of isolated primary chondrocytes (Iso. Chond.) and the size of chondrocytes in articular cartilage (In Cart.) are included for comparison. ##### located on the top indicates  $p < 0.0001$  (Spearman's rank correlation). \*\*\*\* indicate statistically significant differences when compared to control (Iso. Chond.) with  $p < 0.0001$  respectively (one-way ANOVA).

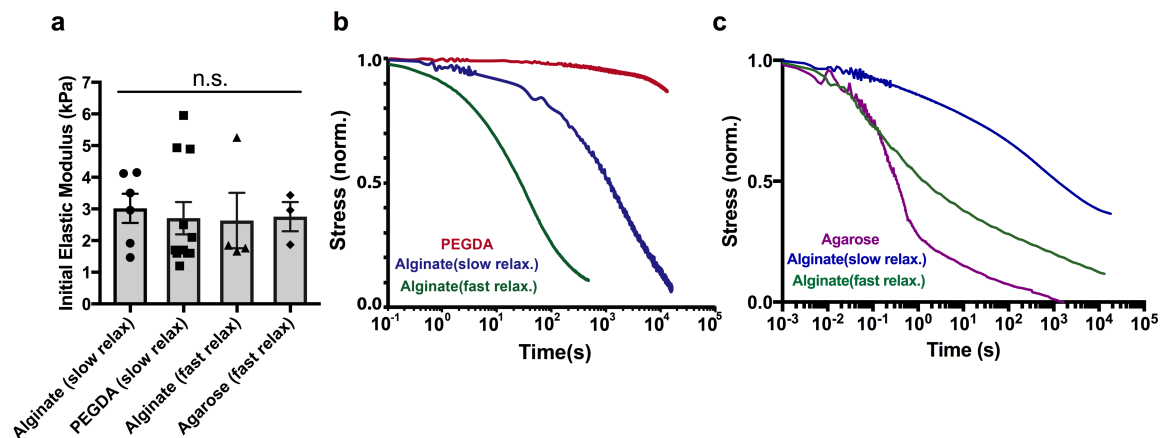

**Supplementary Figure 15 | Initial elastic modulus and stress relaxation of PEG and agarose hydrogels.** **a**, Initial elastic modulus of the PEG and agarose hydrogels measured using compression. No significant differences between elastic moduli were detected (one-way ANOVA,  $p = 0.9211$ ). Data are shown as mean  $\pm$  s.e.m.,  $n > 3$  replicates per conditions. **b**, Stress relaxation profile of PEG hydrogels. Stress relaxation of fast relaxing (green,  $\tau_{1/2} = 478$ s) and slow relaxing (blue,  $\tau_{1/2} = 7058$ s) alginate gels are shown for comparison. **c**, Shear stress relaxation profile of agarose hydrogels conducted in a rheometer with a 15% shear strain. Stress relaxation of fast relaxing and slow relaxing alginate gels are shown for comparison.

Faster stress relaxation | Greater Creep | Greater Loss Tangent

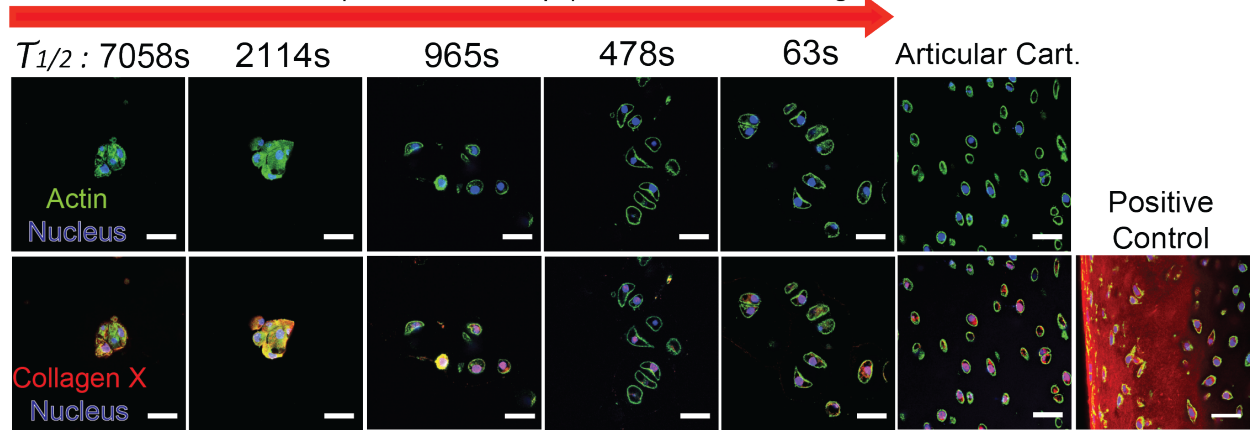

**Supplementary Figure 16 | Type X collagen deposition by chondrocytes cultured in 3 kPa**

**gels.** Representative stainings of type X collagen produced by chondrocytes cultured in 3kPa hydrogels for 21 days with the indicated timescale of stress relaxation. No staining of type X collagen is observed for cells in the hydrogels. Staining of articular cartilage (Articular Cart.) is shown for comparison. Scale bar, 25  $\mu\text{m}$ .

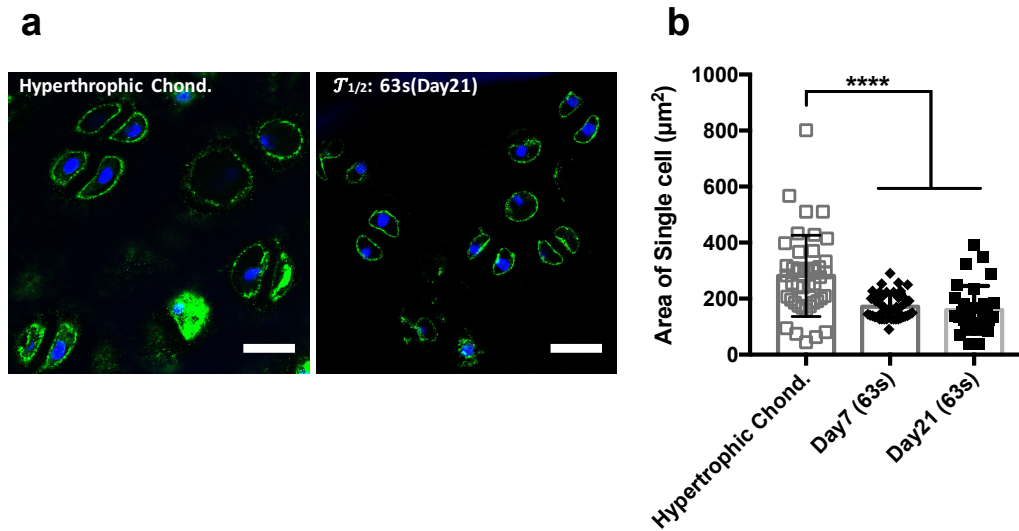

**Supplementary Figure 17 | Size differences between hypertrophic chondrocytes in the deep zone of bovine articular cartilage and chondrocytes cultured in the fast relaxing hydrogel for 21 days** **a**, Representative immunofluorescence images with staining for actin (green) and nucleus (blue) for chondrocytes in the indicated conditions. Scale bar, 25 $\mu\text{m}$ . **b**, Quantification of single cell size of hypertrophic chondrocytes in the deep zone in bovine articular cartilage and for chondrocytes in hydrogels of indicated conditions. \*\*\*\* indicates statistically significant differences when compared to the case of hypertrophic chondrocytes with  $p < 0.0001$  respectively (one-way ANOVA).

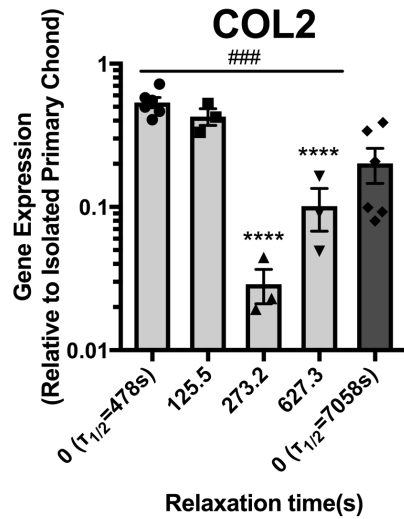

**Supplementary Figure 18 | Gene expression of type II collagen impacted by osmotic pressure.** Quantification of relative gene expressions of type II collagen to that of isolated primary chondrocytes after 7 days of culture in the indicated conditions. Gene expression of type II collagen decreased significantly with higher osmotic pressure (###  $p < 0.001$  by Spearman's rank correlation and \*\*\*  $p < 0.001$ , \*\*\*\*  $p < 0.0001$  compared to control ( $\tau_{1/2} = 478s$ ) by one-way ANOVA). Data are shown as mean  $\pm$  s.e.m.,  $n=3$  replicates per conditions.

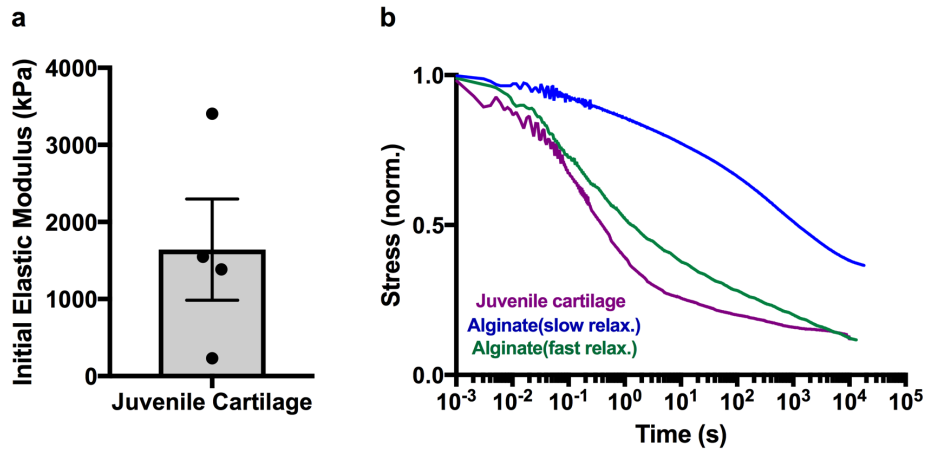

**Supplementary Figure 19 | Initial elastic modulus and stress relaxation of juvenile cartilage.**

a, Initial elastic modulus of the juvenile cartilage measured using unconfined compression. Data are shown as mean  $\pm$  s.e.m., n=4 replicates. b, Shear stress relaxation profile of juvenile cartilage conducted in a rheometer with a 15% shear strain. Stress relaxation of fast relaxing and slow relaxing alginate gels are shown for comparison. Juvenile cartilage exhibits fast stress relaxation.



*Lee, et al.,*

**Supplementary video 1 | Brightfield time-lapse videos of chondrocytes for 44 hours following encapsulation in fast relaxing hydrogel.** Chondrocyte exhibits volume expansion.

**Supplementary video 2 | Brightfield time-lapse videos of chondrocytes for 44 hours following encapsulation in slow relaxing hydrogel.** Chondrocyte does not expand its volume.

**Supplementary Table 1 | List of all hydrogel compositions used in study.**

| <b>Description</b>                 | <b>Avg. MW of alginate (kDa)</b> | <b>Cross-linker conc. (mM)</b> | <b>Alginate conc. (wt/vol, %)</b> | <b>Initial elastic modulus (kPa, mean +/- s.d.)</b> | <b>Stress relaxation halftime, <math>\tau_{1/2}</math> (s, mean +/- s.d.)</b> |
|------------------------------------|----------------------------------|--------------------------------|-----------------------------------|-----------------------------------------------------|-------------------------------------------------------------------------------|
| High MW<br>low stiffness           | 280                              | 9.8                            | 2                                 | 3.0 +/- 1.1                                         | 7058 +/- 1416                                                                 |
| Mid & High MW<br>low stiffness     | 280 & 70                         | 12.8                           | 2                                 | 3.5 +/- 0.8                                         | 2114 +/- 348                                                                  |
| Mid MW<br>low stiffness            | 70                               | 15.9                           | 2                                 | 3.0 +/- 1.0                                         | 965 +/- 216                                                                   |
| Low MW<br>low stiffness            | 35                               | 28.1                           | 2                                 | 2.7 +/- 1.6                                         | 478 +/- 97                                                                    |
| Low MW-5K<br>PEG<br>low stiffness  | 35                               | 36.6                           | 2                                 | 2.8 +/- 0.9                                         | 63 +/- 25                                                                     |
| High MW<br>high stiffness          | 280                              | 24.4                           | 2                                 | 18.5 +/- 3.8                                        | 1007 +/- 163                                                                  |
| Mid & High MW<br>high stiffness    | 280 & 70                         | 28.7                           | 2                                 | 18.2 +/- 4.5                                        | 345 +/- 53                                                                    |
| Mid MW<br>high stiffness           | 70                               | 32.9                           | 2                                 | 17.8 +/- 3.2                                        | 189 +/- 25                                                                    |
| Low MW<br>high stiffness           | 35                               | 54.9                           | 2                                 | 19.0 +/- 4.5                                        | 68 +/- 8                                                                      |
| Low MW-5K<br>PEG<br>high stiffness | 35                               | 73.2                           | 2                                 | 19.9 +/- 2.5                                        | 42 +/- 12                                                                     |

**Supplementary Table 2 | List of specific primers for real-time polymerase chain reaction.**

| <b>Name</b>                       | <b>Forward/Reverse</b>                | <b>T(°C)</b> | <b>Gen Bank No.</b> | <b>References</b> |
|-----------------------------------|---------------------------------------|--------------|---------------------|-------------------|
| <b>COL1A2<br/>(COL1)</b>          | <b>F: 5' ACATTGGCCCAGTCTGTTTC 3'</b>  | 55           | NM_174520.2         | 58                |
|                                   | <b>R: 5' GGGAGGGGGAGTGAATTA 3'</b>    |              |                     |                   |
| <b>COL2A1<br/>(COL2)</b>          | <b>F: 5' GTGGGGCAAGACTATGATCG 3'</b>  | 55           | NM_001113224        | 58                |
|                                   | <b>R: 5' TGCAATGGATTGTGTTGGTT 3'</b>  |              |                     |                   |
| <b>COL10A1<br/>(COL10)</b>        | <b>F: 5' TTCTTCATCCCGTATGCCA 3'</b>   | 53           | NM_174634.1         | 59                |
|                                   | <b>R: 5' GGTGGACCAGGGATGCC 3'</b>     |              |                     |                   |
| <b>Aggrecan<br/>(AGGRECAN)</b>    | <b>F: 5' CACCACAGCAGGTGAACTAGA 3'</b> | 56           | NM_173981.2         | 58                |
|                                   | <b>R: 5' GCTTGCTCCTCCACTAATGTC 3'</b> |              |                     |                   |
| <b>Sox9<br/>(SOX9)</b>            | <b>F: 5' ACGCGCCCCAGGAGAAC 3'</b>     | 60           | XR_083993.1         | 27                |
|                                   | <b>R: 5' CGGATGCACACGGGAACT 3'</b>    |              |                     |                   |
| <b>MMP13<br/>(MMP13)</b>          | <b>F: 5' TTCTGGCACACGCTTTTCCTC 3'</b> | 58           | NM_174389.2         | 60                |
|                                   | <b>R: 5' GGTTGGGGTCTTCATCTCCTG 3'</b> |              |                     |                   |
| <b>ADAMTS4<br/>(ADAMTS4)</b>      | <b>F: 5' TGGATCCTGAGGAGCCCTG 3'</b>   | 59           | NM_181667.1         | 61                |
|                                   | <b>R: 5' TGGCGGTCAGCATCATAGTC 3'</b>  |              |                     |                   |
| <b>Interleukin-1β<br/>(IL-1β)</b> | <b>F: 5' GCTCTCCACCTCCTCTCACAG 3'</b> | 59           | NM_174093.1         | 61                |
|                                   | <b>R: 5' TACATTCTTCCCTTCCCTTCT 3'</b> |              |                     |                   |
| <b>Beta-actin<br/>(β actin)</b>   | <b>F: 5' GGTCATCACCATTGGCAATG 3'</b>  | 54           | NM_173979.3         | 59                |
|                                   | <b>R: 5' CCACAGGACTCCATGCC 3'</b>     |              |                     |                   |

**Supplementary Table 3 | Details for statistical analyses.** F indicates F-values for ANOVA tests, T indicates t-values for t-tests, and df indicates degrees of freedom.

| Figure                  | Analysis       | One-tail or Two-tail | F (dfn, dfd) or T, df                                            |
|-------------------------|----------------|----------------------|------------------------------------------------------------------|
| Figure 1b               | One-way ANOVA  | Two-tail             | F (4, 25) = 115.1                                                |
| Figure 1c               | One-way ANOVA  | Two-tail             | F (4, 15) = 0.3048                                               |
| Figure 1d               | One-way ANOVA  | Two-tail             | F (4, 10) = 25.68                                                |
| Figure 1f               | One-way ANOVA  | Two-tail             | F (4, 10) = 18.89                                                |
| Figure 1g               | Student t-test | Two-tail             | t=0.431 df=4                                                     |
|                         | Two-way ANOVA  | Two-tail             | Relax: F (4, 27) = 2.217<br>Time: F (1, 27) = 0.1105             |
| Figure 1h               | Student t-test | Two-tail             | t=0.6109 df=4                                                    |
|                         | Two-way ANOVA  | Two-tail             | Relax: F (4, 30) = 0.799<br>Time: F (1, 30) = 0.2981             |
| Figure 2c               | One-way ANOVA  | Two-tail             | F (4, 25) = 45.55                                                |
| Figure 2d               | Two-way ANOVA  | Two-tail             | Relax: F (4, 117) = 48.42<br>Time: F (3, 117) = 77.57            |
| Figure 2e               | Two-way ANOVA  | Two-tail             | Relax: F (4, 201) = 141.9<br>Time: F (3, 201) = 193.4            |
| Figure 2f               | Student t-test | Two-tail             | 986s: t=4.801 df=10<br>412s: t=6.155 df=10<br>65s: t=2.235 df=11 |
| Figure 2g               | Student t-test | Two-tail             | 986s: t=13.55 df=19<br>412s: t=13.01 df=16<br>65s: t=1.955 df=19 |
| Figure 3a               | Two-way ANOVA  | Two-tail             | Relax: F (4, 204) = 29.44<br>Time: F (3, 204) = 33.05            |
| Figure 3c               | One-way ANOVA  | Two-tail             | F (4, 10) = 19.86                                                |
| Figure 3d               | One-way ANOVA  | Two-tail             | F (4, 22) = 7.361                                                |
| Figure 3e               | One-way ANOVA  | Two-tail             | F (4, 13) = 20.3                                                 |
| Figure 3f               | One-way ANOVA  | Two-tail             | F (4, 13) = 8.849                                                |
| Figure 3g               | One-way ANOVA  | Two-tail             | F (4, 13) = 2.017                                                |
| Figure 3h               | One-way ANOVA  | Two-tail             | F (4, 12) = 4.275                                                |
| Figure 3i               | One-way ANOVA  | Two-tail             | F (4, 12) = 3.433                                                |
| Figure 4a               | One-way ANOVA  | Two-tail             | F (4, 11) = 7.425                                                |
| Figure 4b               | One-way ANOVA  | Two-tail             | F (4, 15) = 25.62                                                |
| Figure 4c               | Student t-test | Two-tail             | t=8.058 df=14                                                    |
| Figure 4d               | Student t-test | Two-tail             | t=3.223 df=8                                                     |
| Figure 4e               | Student t-test | Two-tail             | t=3.81 df=14                                                     |
| Figure 5b               | One-way ANOVA  | Two-tail             | F (5, 253) = 70.88                                               |
| Figure 5d               | Student t-test | Two-tail             | t=8.159 df=57                                                    |
| Figure 5e               | Student t-test | Two-tail             | t=1.113 df=65                                                    |
| Figure 5g               | One-way ANOVA  | Two-tail             | F (4, 292) = 85.8                                                |
| Figure 5i               | One-way ANOVA  | Two-tail             | F (4, 10) = 27.1                                                 |
| Figure 5j               | One-way ANOVA  | Two-tail             | F (4, 21) = 8.679                                                |
| Figure 5k               | One-way ANOVA  | Two-tail             | F (3, 11) = 34.28                                                |
| Figure 5l               | One-way ANOVA  | Two-tail             | F (3, 8) = 27.69                                                 |
| Figure 5m               | One-way ANOVA  | Two-tail             | F (3, 11) = 64.14                                                |
| Supplementary Figure 1b | One-way ANOVA  | Two-tail             | F (4, 10) = 43.56                                                |
| Supplementary Figure 5a | One-way ANOVA  | Two-tail             | F (2, 16) = 0.008748                                             |
| Supplementary Figure 5b | One-way ANOVA  | Two-tail             | F (2, 15) = 0.2128                                               |
| Supplementary Figure 6a | One-way ANOVA  | Two-tail             | F (4, 14) = 106.4                                                |

|                          |                |          |                                                                           |
|--------------------------|----------------|----------|---------------------------------------------------------------------------|
| Supplementary Figure 6b  | One-way ANOVA  | Two-tail | $F(4, 38) = 0.7664$                                                       |
| Supplementary Figure 8a  | Two-way ANOVA  | Two-tail | Relax: $F(4, 129) = 44.72$<br>Time: $F(3, 129) = 113$                     |
| Supplementary Figure 8b  | Two-way ANOVA  | Two-tail | Relax: $F(4, 166) = 66.65$<br>Time: $F(3, 166) = 78.85$                   |
| Supplementary Figure 8c  | Two-way ANOVA  | Two-tail | Relax: $F(4, 181) = 28.97$<br>Time: $F(3, 181) = 41.56$                   |
| Supplementary Figure 10a | One-way ANOVA  | Two-tail | $F(4, 20) = 13.29$                                                        |
| Supplementary Figure 10b | Student t-test | Two-tail | 986s: $t=5.778$ $df=8$<br>412s: $t=9.614$ $df=9$<br>65s: $t=2.705$ $df=9$ |
| Supplementary Figure 12a | One-way ANOVA  | Two-tail | $F(4, 10) = 8.309$                                                        |
| Supplementary Figure 12b | One-way ANOVA  | Two-tail | $F(4, 10) = 7.354$                                                        |
| Supplementary Figure 12c | One-way ANOVA  | Two-tail | $F(4, 10) = 3.185$                                                        |
| Supplementary Figure 12d | One-way ANOVA  | Two-tail | $F(4, 10) = 4.765$                                                        |
| Supplementary Figure 12e | One-way ANOVA  | Two-tail | $F(4, 10) = 7.997$                                                        |
| Supplementary Figure 12f | One-way ANOVA  | Two-tail | $F(4, 10) = 7.116$                                                        |
| Supplementary Figure 12g | One-way ANOVA  | Two-tail | $F(4, 10) = 9.882$                                                        |
| Supplementary Figure 12h | One-way ANOVA  | Two-tail | $F(4, 10) = 2.068$                                                        |
| Supplementary Figure 14b | One-way ANOVA  | Two-tail | $F(5, 173) = 14.66$                                                       |
| Supplementary Figure 15a | One-way ANOVA  | Two-tail | $F(3, 20) = 0.07132$                                                      |
| Supplementary Figure 17b | One-way ANOVA  | Two-tail | $F(2, 116) = 17.64$                                                       |
| Supplementary Figure 18  | One-way ANOVA  | Two-tail | $F(3, 11) = 30.63$                                                        |
